# Supplementary material for: Dispersal capacities of pollen, seeds and spores: insights from comparative analyses of spatial genetic structures in bryophytes and spermatophytes
Source: Front Plant Sci. 2023 Oct 30;14:1289240. doi: 10.3389/fpls.2023.1289240 (PMC10642818; doi:10.3389/fpls.2023.1289240)
Supplement: Supplementary Table 1 — Datasets employed in the comparative analysis of the spatial genetic structure of bryophytes and spermatophytes in western Europe: species selected, literature source, number of loci and sample size (southern-northern). [file Table_1.xlsx]

## Sheet: Feuil1
species_selected	literature source	number of loci	sample size (southern-northern)
Antitrichia curtipendula	Hedenas 2008 https://doi.org/10.1111/j.1095-8339.2007.00775.x	2	37 (8 - 29)
Amphidium mougeotii	Ledent et al. 2019 https://doi.org/10.1111/ele.13254	3	56 (15 - 41)
Calypogeia fissa	Ledent et al. 2019	1	26 (6 - 20)
Homalothecium sericeum	Ledent et al. 2019	1	46 (22 - 24)
Metzgeria furcata	Ledent et al. 2019	1	59 (18 - 41)
Lewinskya affine	Ledent et al. 2019	4	57 (13 - 44)
Pulvigera lyellii	Ledent et al. 2019	4	81 (19 - 62)
Plagiomnium undulatum	Ledent et al. 2019	3	57 (22 - 35)
Plagiothecium undulatum	Ledent et al. 2019	2	42 (6 - 36)
Scorpiurium circinatum	Ledent et al. 2019	2	18 (12 - 6)
Sphagnum fimbriatum	Szovenyi et al. 2006 https://doi.org/10.1111/j.1469-8137.2006.01870.x	1	34 (6 - 28)
Arabis alpina	Koch et al. 2006 https://doi.org/10.1111/j.1365-294X.2005.02848.x	2	38 (28 - 10)
Alnus glutinosa	Havrdova et al. 2015 https://doi.org/10.1111/mec.13348	1	198 (57 - 141)
Aegilops geniculata	Arrigo et al. 2010 https://doi.org/10.1111/j.1469-8137.2010.03328.x	1	63 (50 - 13)
Arabidopsis thaliana	Beck et al. 2008 https://doi.org/10.1111/j.1365-294X.2007.03615.x	3	130 (45 - 85)
Beta vulgaris maritima	Touzet et al. 2018 https://doi.org/10.1002/ece3.3774	4	19 (10 - 9)
Carex extensa	Escudero et al. 2010 https://doi.org/10.1111/j.1365-294X.2009.04449.x	1	52 (37 - 15)
Ceratonia siliqua	Viruel et al. 2019 https://doi.org/10.1111/jbi.13726	1	124 (94 - 30)
Calluna vulgaris	Gil-lopez et al. 2022 https://doi.org/10.1093/botlinnean/boab043	1	132 (64 - 68)
Hedera helix	Valcarcel et al. 2017 https://doi.org/10.1093/botlinnean/boab043	1	27 (18 - 9)
Hordeum marinum	Jakob et al. 2007 https://doi.org/10.1111/j.1365-294X.2007.03228.x	1	94 (45 - 49)
Helianthemum nummularium	Volkova et al. 2016 https://link.springer.com/article/10.1007/s00606-016-1299-1#Sec12	1	26 (10 - 16)
Lavatera maritima	Villa-Machio et al. 2018 https://doi.org/10.1093/botlinnean/boy025	1	62 (44 - 18)
Myrtus communis	Migliore et al. 2018 https://doi.org/10.1093/botlinnean/boy032	3	158 (120 - 38)
Microthlaspi perfoliatum	Ali et al. 2019 https://doi.org/10.1016/j.flora.2019.02.012	2	153 (117 - 36)
Primula vulgaris	Volkova et al. 2020 https://pbsociety.org.pl/journals/index.php/asbp/article/view/asbp.89313	2	21 (8 - 13)
Sedum album	Listl et al. 2017 https://doi.org/10.1371/journal.pone.0179961	1	24 (10 - 14)
Silene nutans	Van Rossum et al. 2018 https://doi.org/10.1016/j.ppees.2018.10.003	1	258 (9 - 249)
